# Supplementary material for: Tracing day-zero and forecasting the COVID-19 outbreak in Lombardy, Italy: A compartmental modelling and numerical optimization approach
Source: PubMed Central journal article supplement (PMC7598513; doi:10.1371/journal.pone.0240649), 2020-10-30
Supplement: pone.0240649.s001.pdf [file pone.0240649.s001.pdf]

## S1 File

### Data

All the relevant data used in this paper are publicly available and accessible at <http://www.salute.gov.it/>. The reported cumulative numbers of cases from February 21 to March 19 are listed in S1 Table . The reported numbers of confirmed cases from March 20 to May 20 are listed in S2 Table .

**S1 Table.** Reported cumulative numbers of cases for Lombardy, Italy (February 21-March 19)

| Calibration Data |          |           |        | Validation Data |          |           |        |
|------------------|----------|-----------|--------|-----------------|----------|-----------|--------|
| Date             | Infected | Recovered | Deaths | Date            | Infected | Recovered | Deaths |
| Feb 21           | 15       | 0         | 0      | March 09        | 5469     | 646       | 333    |
|                  | 22       | 54        | 0      | 10              | 5791     | 896       | 468    |
|                  | 23       | 1101      | 0      | 11              | 7280     | 900       | 617    |
|                  | 24       | 172       | 0      | 12              | 8725     | 1085      | 744    |
|                  | 25       | 240       | 0      | 13              | 9820     | 1198      | 880    |
|                  | 26       | 258       | 0      | 14              | 11685    | 1660      | 966    |
|                  | 27       | 403       | 40     | 15              | 13272    | 2011      | 1218   |
|                  | 28       | 531       | 40     | 16              | 14649    | 2368      | 1420   |
|                  | 29       | 615       | 40     | 17              | 16220    | 2485      | 1640   |
| March 01         | 984      | 73        | 31     | 18              | 17713    | 3488      | 1959   |
|                  | 02       | 1254      | 139    | 19              | 19884    | 3778      | 2168   |
|                  | 03       | 1529      | 139    |                 |          |           |        |
|                  | 04       | 1820      | 250    |                 |          |           |        |
|                  | 05       | 2251      | 376    |                 |          |           |        |
|                  | 06       | 2612      | 469    |                 |          |           |        |
|                  | 07       | 3420      | 524    |                 |          |           |        |
|                  | 08       | 4189      | 550    |                 |          |           |        |

S2 **Table.** Reported numbers of confirmed cases for Lombardy, Italy (March 20-May 4)

| Date     | Infected | Recovered | Deaths | Date     | Infected | Recovered | Deaths |
|----------|----------|-----------|--------|----------|----------|-----------|--------|
| March 20 | 15420    | 4295      | 2549   | April 16 | 33090    | 18396     | 11608  |
| 21       | 17370    | 5050      | 3095   | 17       | 33434    | 18850     | 11851  |
| 22       | 17885    | 5865      | 3456   | 18       | 34195    | 19136     | 12050  |
| 23       | 18910    | 6075      | 3776   | 19       | 34497    | 19526     | 12213  |
| 24       | 19868    | 6657      | 4178   | 20       | 34587    | 20008     | 12376  |
| 25       | 20591    | 7281      | 4474   | 21       | 33978    | 21374     | 12579  |
| 26       | 22189    | 7839      | 4861   | 22       | 34242    | 22110     | 12740  |
| 27       | 23895    | 8001      | 5402   | 23       | 33873    | 23352     | 12940  |
| 28       | 24509    | 8962      | 5944   | 24       | 34368    | 23782     | 13106  |
| 29       | 25392    | 9255      | 6360   | 25       | 34473    | 24227     | 13269  |
| 30       | 25006    | 10337     | 6818   | 26       | 35166    | 24398     | 13325  |
| 31       | 25124    | 10885     | 7199   | 27       | 35441    | 24589     | 13449  |
| April 1  | 25765    | 11415     | 7593   | 28       | 35744    | 25029     | 13575  |
| 02       | 25876    | 12229     | 7960   | 29       | 36122    | 25333     | 13679  |
| 03       | 26189    | 13020     | 8311   | 30       | 36211    | 25749     | 13772  |
| 04       | 27220    | 13242     | 8656   | May 1    | 36473    | 26136     | 13860  |
| 05       | 28124    | 13426     | 8905   | 2        | 36667    | 26146     | 14189  |
| 06       | 28469    | 13863     | 9202   | 3        | 36926    | 26371     | 14231  |
| 07       | 28343    | 14498     | 9484   | 4        | 37307    | 26504     | 14294  |
| 08       | 28545    | 15147     | 9722   |          |          |           |        |
| 09       | 29074    | 15706     | 10022  |          |          |           |        |
| 10       | 29530    | 16280     | 10238  |          |          |           |        |
| 11       | 30258    | 16823     | 10511  |          |          |           |        |
| 12       | 31265    | 17166     | 10621  |          |          |           |        |
| 13       | 31935    | 17478     | 10901  |          |          |           |        |
| 14       | 32363    | 17821     | 11142  |          |          |           |        |
| 15       | 32921    | 17855     | 11377  |          |          |           |        |

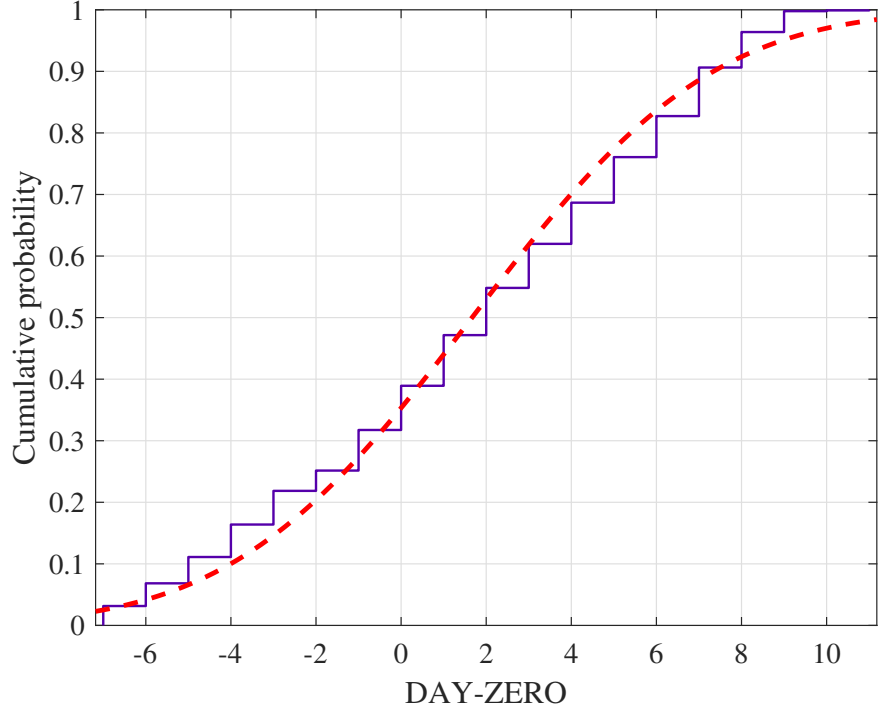

**S1 Fig.** Cumulative probability distribution of the optimal values of day-zero as obtained by running the optimization problem using a grid of  $20 \times 13 \times 15$  initial guesses, thus using a 2 days step for the day-zero within the interval 27 December 2019-5th of February 2020 i.e.  $\pm 20$  days around the 16th of January, a step of 0.05 within the interval (0.3, 0.9) for  $\beta$  and a step of 0.02 within the interval (0.01, 0.29) for  $\epsilon =$ . The best fit was obtained with the Normal CDF with  $\mu = 1.67$  (95% CI: 1.53, 1.80) (thus corresponding to the 14th of January) and  $\sigma = 4.43$  (95% CI:4.33, 4.52).

## Fitting the Distributions of the Optimal Values

We fitted the cumulative probability distributions of day-zero  $\beta$ ,  $\epsilon$  using several functions including the Normal, Log-normal, Weibull, Beta, Gamma, Burr, Exponential and Birnbaum-Saunders CDFs and kept the one resulting in the maximum Log-likelihood. For the day-zero, the best fit to the distribution of the optimal values was obtained by the Normal CDF:

$$F(x|\mu, \sigma) = \frac{1}{2} \left( 1 + \operatorname{erf} \left( \frac{x - \mu}{\sigma \sqrt{2}} \right) \right),$$

with mean value  $\mu = 1.67$  (95% CI: 1.53, 1.80) and  $\sigma = 4.43$  (95% CI:4.33, 4.52).

The cumulative distribution of day-zero and the resulting exponential distribution are given in S1 Fig.

For the distribution of  $\beta$  values the best fitting distribution was obtained by the Burr CDF which is a three-parameter family of curves given by:

$$F(x|\alpha, c, k) = 1 - \frac{1}{\left( 1 + \left( \frac{x}{\alpha} \right)^c \right)^k}, x, \alpha, k, c > 0$$

with  $\alpha = 0.654$  (95% CI: 0.653, 0.655),  $c = 276.061$  (95% CI: 248.911, 306.172),  $k = 0.0537$  (95% CI: 0.048, 0.060). Thus, the resulting mean value is  $\beta = 0.70$ . The

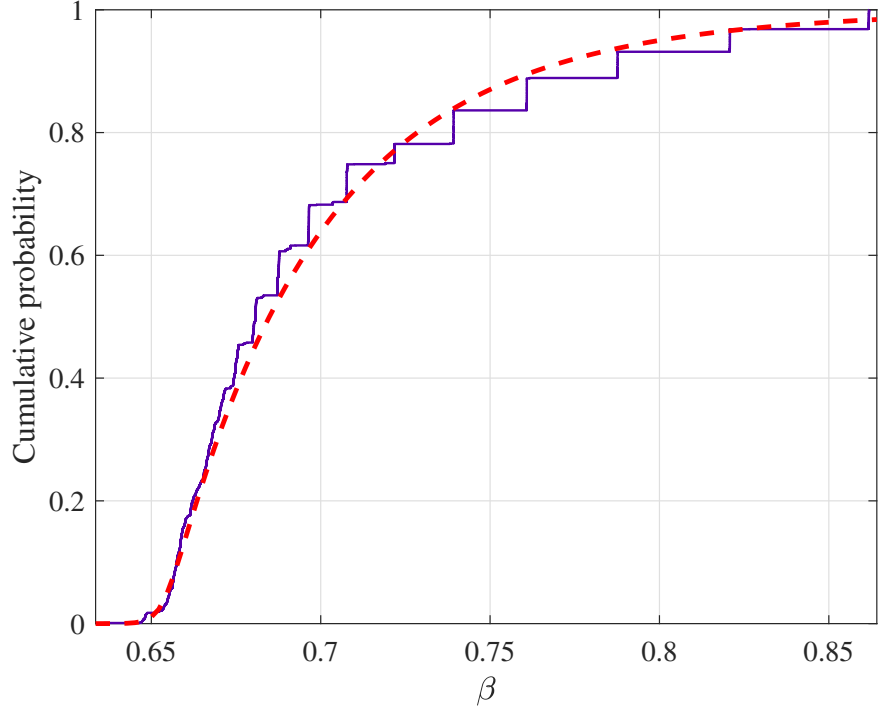

**S2 Fig.** Cumulative probability distribution of the optimal values of  $\beta$  as obtained by running the optimization problem using a grid of  $20 \times 13 \times 15$  initial guesses, thus using a 2days step for the day-zero within the interval 27 December 2019-5th of February 2020 i.e.  $\pm 20$  days around the 16th of January, a step of 0.05 within the interval (0.3, 0.9) for  $\beta$  and a step of 0.02 within the interval (0.01, 0.29) for  $\epsilon$ . The best fit was obtained with the Burr CDF, with  $\alpha = 0.654$  (95% CI: 0.653, 0.655),  $c = 276.061$  (95% CI: 248.911, 306.172),  $k = 0.0537$  (95% CI: 0.048, 0.060).

cumulative distribution of *beta* and the resulting Burr CDF distribution are given in S2 Fig.

For  $\epsilon$ , the best fit to the distribution of the optimal values was obtained by a Birnbaum-Saunders CDF:

$$F(x|\mu, \alpha) = \Phi\left(\frac{1}{\alpha}\left(\sqrt{\frac{x}{\mu}} - \sqrt{\frac{\mu}{x}}\right)\right),$$

with  $\mu = 0.0492$  (95% CI: 0.048, 0.0505) (scale parameter) and  $\alpha = 0.934$  (95% CI: 0.914, 0.954) (shape parameter).  $\Phi(x)$  denotes the standard normal CDF. The mean value is given by:

$$\mu\left(1 + \frac{\alpha^2}{2}\right)$$

Thus, the mean value is given by  $\epsilon = 0.0707$ .

The cumulative distribution of  $\epsilon$  and the resulting exponential distribution are given in S3 Fig.

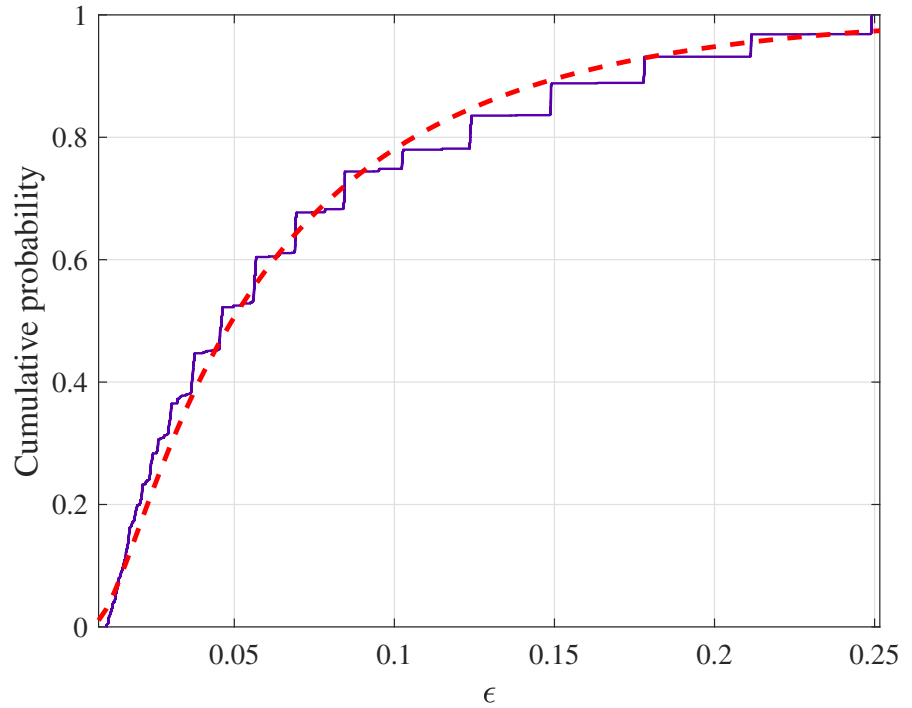

**S3 Fig.** Cumulative probability distribution of the optimal values of  $\epsilon$  as obtained by running the optimization problem using a grid of  $20 \times 13 \times 15$  initial guesses, thus using a 2days step for the day-zero within the interval 27 December 2019-5th of February 2020 i.e.  $\pm 20$  days around the 16th of January, a step of 0.05 within the interval (0.3, 0.9) for  $\beta$  and a step of 0.02 within the interval (0.01, 0.29) for  $\epsilon$ . The best fit was obtained by a Birnbaum-Saunders CDF,  $\mu = 0.0492$  (95% CI: 0.048, 0.0505) (scale parameter) and  $\alpha = 0.934$  (95% CI: 0.914, 0.954) (shape parameter).
